# Supplementary material for: Incidence of cardiovascular disease up to 13 year after cancer diagnosis: A matched cohort study among 32 757 cancer survivors
Source: PubMed Central journal article supplement (PMC6198235; doi:10.1002/cam4.1754), 2018-09-15

Figure S1: Kaplan Meijer curves presenting time to incident CVD for cancer survivors versus age-, gender-, and geographically- matched cancer-free controls separately for each malignancy

Breast cancer (log-rank statistic = 0.83)

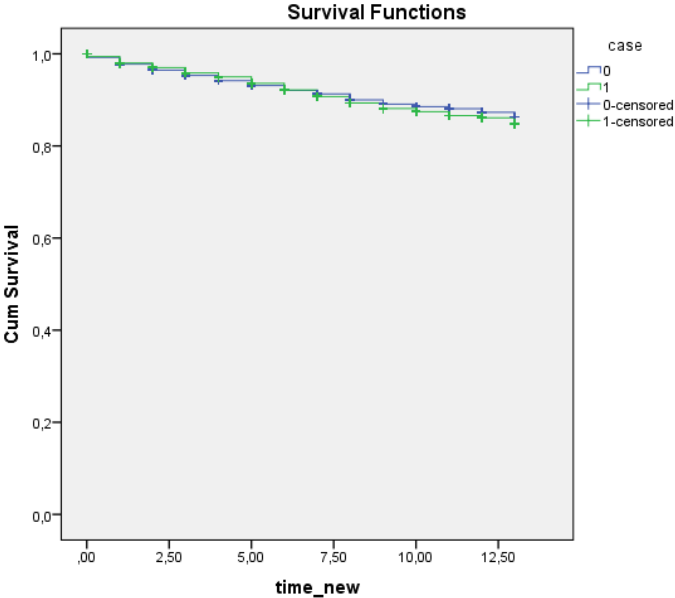

Prostate cancer (log-rank statistic  $p < 0.01$ )

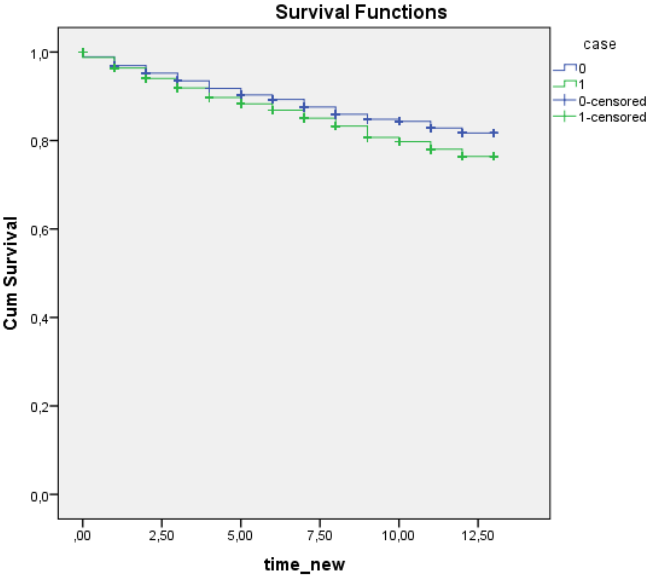

Non-Hodgkin (log-rank statistic  $p < 0.01$ )

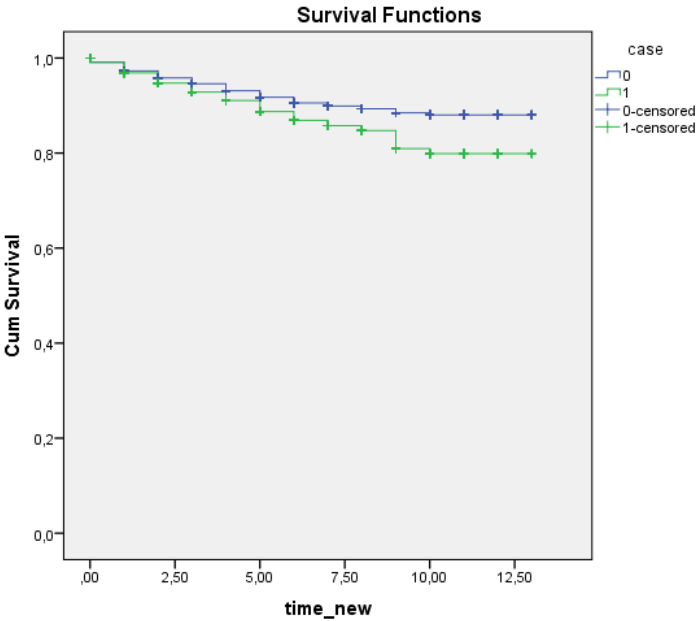

Lung & trachea cancer (log-rank statistic,  $p < 0.01$ )

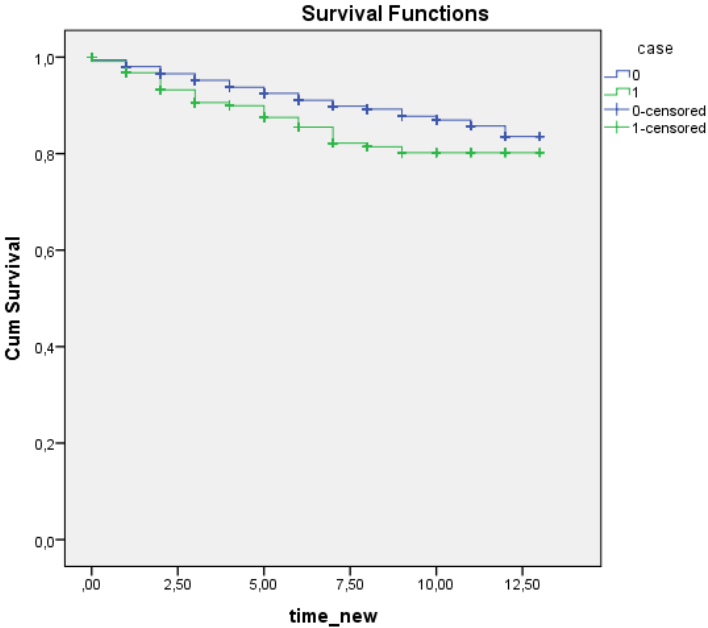

Basal cell carcinoma (log-rank statistics  $P < 0.01$ )

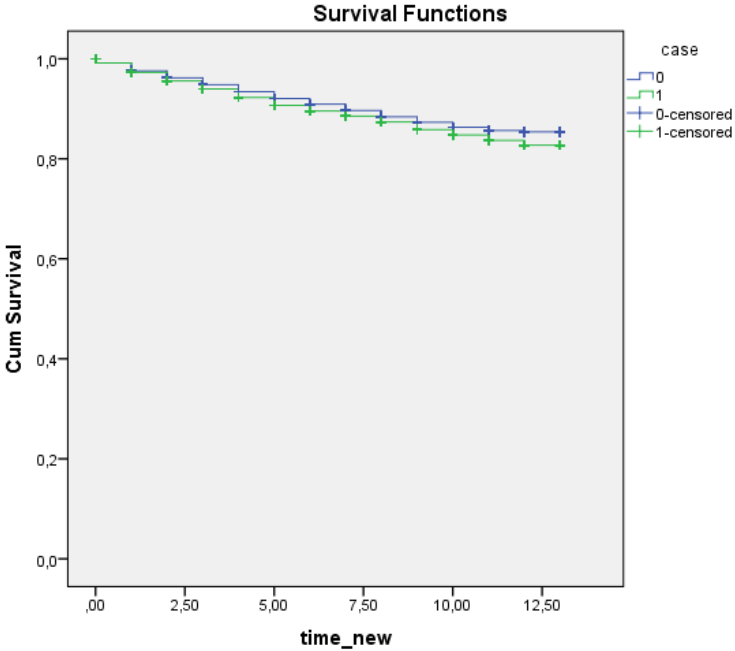

Colorectal cancer (log-rank statistic,  $p = 0.07$ )

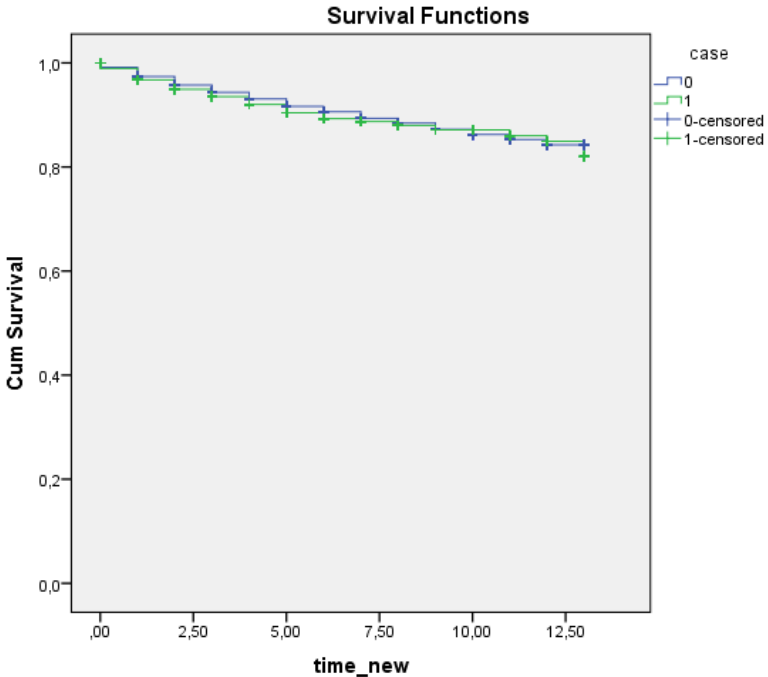

Supplement: CAM4-7-4952-s001.pdf [file CAM4-7-4952-s001.pdf]
